# Supplementary material for: The BMP Receptor 2 in Pulmonary Arterial Hypertension: When and Where the Animal Model Matches the Patient
Source: MDPI journal article supplement (doi:10.3390/cells9061422), 2020-06-08
Supplement: s1 [file s1]

Figure S1

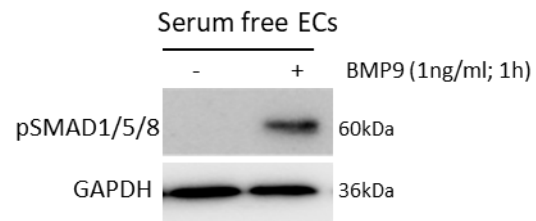

**Fig S1:** *pSmad1/5/8 levels in serum starved microvascular endothelial cells treated with or without BMP9 (1ng/ml) for 1h, indicating BMP9 can induce pSmad1/5/8 in these cells.*
